# Supplementary material for: Antimicrobial phenalenone derivatives from the marine-derived fungus Coniothyrium cereale
Source: Royal Society of Chemistry journal article supplement (doi:10.1039/c0ob00625d), 2010-11-22

## Supporting information

### **Antimicrobial phenalenone derivatives from the marine-derived fungus *Coniothyrium cereale***

Mahmoud Fahmi Elsebai,<sup>†</sup> Stefan Kehraus,<sup>†</sup> Ulrike Lindequist,<sup>§</sup> Florenz Sasse\*, Saad Shaaban\*, Michael Gütschow<sup>#</sup>, Michaele Josten, Hans-Georg Sahl,<sup>‡</sup> and Gabriele M. König<sup>†,\*</sup>

*Institute for Pharmaceutical Biology, University of Bonn, Nussallee 6, 53115 Bonn, Germany.*

*Institute for Medical Microbiology, Immunology, and Parasitology, Pharmaceutical Microbiology Section, University of Bonn, 53115 Bonn, Germany.*

*Institute of Pharmacy, Ernst-Moritz-Arndt-University Greifswald, F.-L.-Jahn-Str. 17, 17489, Greifswald, Germany.*

*\*Department of Chemical Biology, Helmholtz Centre for Infection Research, Inhoffenstrasse 7, D-38124 Braunschweig.*

*Pharmaceutical Institute, Pharmaceutical Chemistry I, University of Bonn, An der Immenburg 4, 53121 Bonn, Germany*

#### Contents:

- S1.** NMR spectroscopic data of compound **1** in CDCl<sub>3</sub>.
- S2.** <sup>1</sup>H NMR spectrum (300 MHz, CDCl<sub>3</sub>) of compound **1**.
- S3.** <sup>13</sup>C NMR (75 MHz, CDCl<sub>3</sub>, upper line) and DEPT 135 (lower line) spectra of compound **1**.
- S4.** NMR spectroscopic data of compound **2** in acetone-*d*<sub>6</sub>.
- S5.** <sup>1</sup>H NMR spectrum (300 MHz, acetone-*d*<sub>6</sub>) of compound **2**.
- S6.** <sup>13</sup>C NMR (75 MHz, acetone-*d*<sub>6</sub>, upper line) and DEPT 135 (lower line) spectra of compound **2**.
- S7.** NMR spectroscopic data of compound **3** in acetone-*d*<sub>6</sub>.
- S8.** <sup>1</sup>H NMR spectrum (300 MHz, acetone-*d*<sub>6</sub>) of compound **3**.
- S9.** <sup>1</sup>H <sup>13</sup>C HMBC spectrum (500 MHz, acetone-*d*<sub>6</sub>) of compound **3**.
- S10.** NMR spectroscopic data of compound **4** in acetone-*d*<sub>6</sub>.
- S11.** <sup>1</sup>H NMR spectrum (300 MHz, CDCl<sub>3</sub>) of compound **4**.
- S12.** <sup>13</sup>C NMR (75 MHz, CDCl<sub>3</sub>, upper line) and DEPT 135 (lower line) spectra of compound **4**.
- S13.** NMR spectroscopic data of compound **5** in acetone-*d*<sub>6</sub>.

- S14.**  $^1\text{H}$  NMR spectrum (300 MHz, acetone- $d_6$ ) of compound **5**.
- S15.**  $^{13}\text{C}$  NMR (75 MHz, acetone- $d_6$ , upper line) and DEPT 135 (lower line) spectra of compound **5**.
- S16.** NMR spectroscopic data of compound **6** in acetone- $d_6$ .
- S17.**  $^1\text{H}$  NMR spectrum (300 MHz, acetone- $d_6$ ) of compound **6**.
- S18.**  $^{13}\text{C}$  NMR (75 MHz, acetone- $d_6$ , upper line) and DEPT 135 (lower line) spectra of compound **6**.
- S19.** NMR spectroscopic data of compound **7** in dms $o$ - $d_6$ .
- S20.**  $^1\text{H}$  NMR spectrum (300 MHz, dms $o$ - $d_6$ ) of compound **7**.
- S21.**  $^{13}\text{C}$  NMR (75 MHz, dms $o$ - $d_6$ , upper line) and DEPT 135 (lower line) spectra of compound **7**.
- S22.**  $^1\text{H}$  NMR spectrum (300 MHz,  $\text{CDCl}_3$ ) of compound **8**.
- S23.**  $^{13}\text{C}$  NMR (75 MHz,  $\text{CDCl}_3$ , upper line) and DEPT 135 (lower line) spectra of compound **8**.
- S24.**  $^1\text{H}$  NMR spectrum (300 MHz,  $\text{CDCl}_3$ ) of compound **9**.
- S25.**  $^{13}\text{C}$  NMR (75 MHz,  $\text{CDCl}_3$ , upper line) and DEPT 135 (lower line) spectra of compound **9**.
- S26.**  $^1\text{H}$  NMR spectrum (500 MHz, dms $o$ - $d_6$ ) of compound **10**.
- S27.**  $^1\text{H}$  NMR spectrum (300 MHz, acetone- $d_6$ ) of compound **11**.
- S28.**  $^{13}\text{C}$  NMR (75 MHz, acetone- $d_6$ , upper line) and DEPT 135 (lower line) spectra of compound **11**.
- S29.**  $^1\text{H}$  NMR spectrum (300 MHz, acetone- $d_6$ ) of compound **12**.
- S30.**  $^{13}\text{C}$  NMR (75 MHz, acetone- $d_6$ , upper line) and DEPT 135 (lower line) spectra of compound **12**.

**S1.** NMR spectroscopic data of compound **1** in CDCl<sub>3</sub>.

| No.  | $\delta^{13}\text{C}$<br>(ppm) | multiplicity    | $\delta^1\text{H}$ (ppm), <i>J</i><br>in Hz | $^1\text{H}$ - $^1\text{H}$<br>COSY | $^1\text{H}$ - $^{13}\text{C}$ HMBC<br>(H to C) |
|------|--------------------------------|-----------------|---------------------------------------------|-------------------------------------|-------------------------------------------------|
| 1    | 97.0                           | CH              | 6.46, s                                     |                                     | 2, 3, 13, 14                                    |
| 2    | 168.0                          | C               |                                             |                                     |                                                 |
| 3    | 92.6                           | C               |                                             |                                     |                                                 |
| 4    | 135.1                          | C               |                                             |                                     |                                                 |
| 5    | 164.7*                         | C               |                                             |                                     |                                                 |
| 6    | -                              |                 |                                             |                                     |                                                 |
| 7    | 165.2*                         | C               |                                             |                                     |                                                 |
| 8    | 97.2                           | C               |                                             |                                     |                                                 |
| 9    | 165.3                          | C               |                                             |                                     |                                                 |
| 10   | 118.3                          | CH              | 6.84, s                                     | 12                                  | 8, 9, 12, 13                                    |
| 11   | 150.7                          | C               |                                             |                                     |                                                 |
| 12   | 26.0                           | CH <sub>3</sub> | 2.81, s                                     | 10                                  | 10, 11, 13                                      |
| 13   | 112.4                          | C               |                                             |                                     |                                                 |
| 14   | 166.7                          | C               |                                             |                                     |                                                 |
| 15   | -                              |                 |                                             |                                     |                                                 |
| 16   | -                              |                 |                                             |                                     |                                                 |
| 17   | -                              |                 |                                             |                                     |                                                 |
| 18   | 25.8                           | CH <sub>3</sub> | 1.85, s                                     | 21                                  | 19, 21, 22                                      |
| 19   | 18.4                           | CH <sub>3</sub> | 1.80, s                                     | 21                                  | 18, 21, 22                                      |
| 20   | 66.6                           | CH <sub>2</sub> | 4.72, d, 6.6                                | 18, 19, 21                          | 14, 18, 19, 21                                  |
| 21   | 117.5                          | CH              | 5.55, br t, 6.6                             | 18, 19, 20                          | 18, 19                                          |
| 22   | 140.2                          | C               |                                             |                                     |                                                 |
| OH-2 |                                |                 | 11.57, s                                    |                                     | 1, 2, 3                                         |
| OH-9 |                                |                 | 11.33, s                                    |                                     | 8, 9, 10                                        |

\*interchangeable

**S2.**  $^1\text{H}$  NMR spectrum (300 MHz,  $\text{CDCl}_3$ ) of compound **1**.

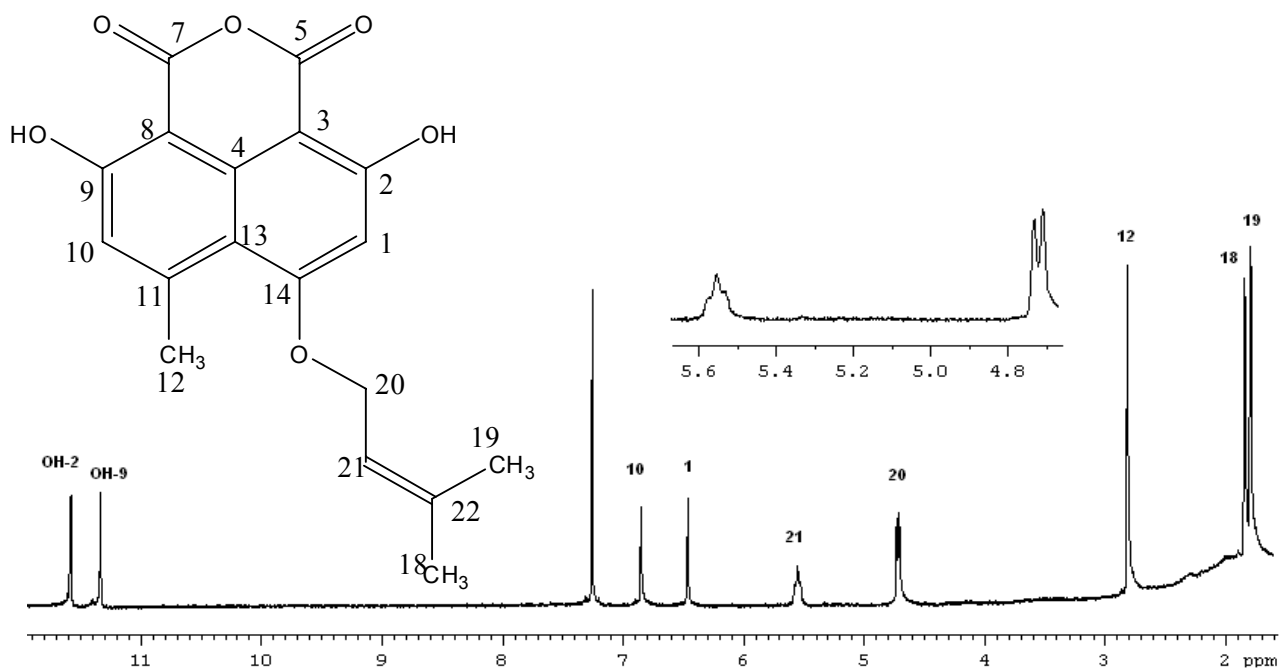

**S3.**  $^{13}\text{C}$  NMR (75 MHz,  $\text{CDCl}_3$ , upper line) and DEPT 135 (lower line) spectra of compound **1**.

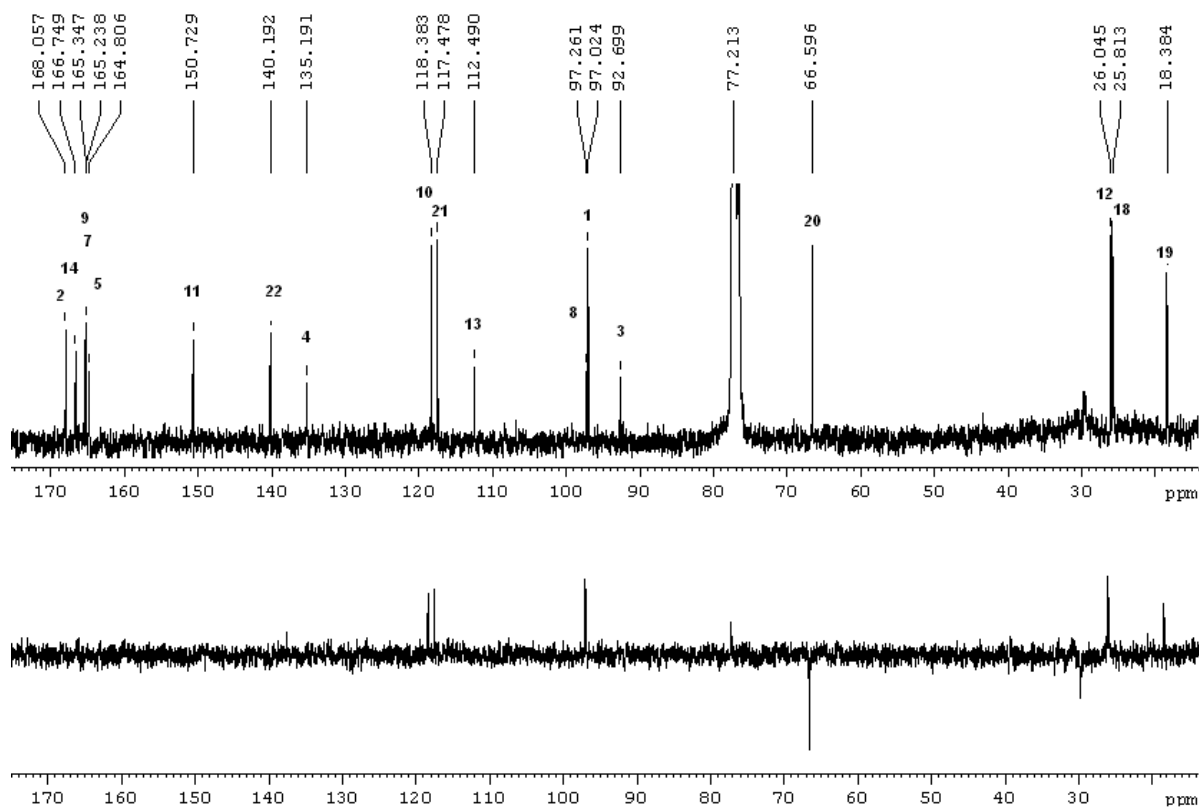

**S4.** NMR spectroscopic data of compound **2** in acetone-*d*<sub>6</sub>.

| No. | $\delta^{13}\text{C}$<br>(ppm) <sup>a</sup> | multiplicity    | $\delta^1\text{H}$ (ppm), <i>J</i><br>in Hz | $^1\text{H}$ - $^1\text{H}$<br>COSY | $^1\text{H}$ - $^{13}\text{C}$ HMBC<br>(H to C) |
|-----|---------------------------------------------|-----------------|---------------------------------------------|-------------------------------------|-------------------------------------------------|
| 1   | 98.1                                        | CH              | 6.67, s                                     |                                     | 2 (w)                                           |
| 2   | 168.7                                       | C               |                                             |                                     |                                                 |
| 3   | 93.7                                        | C               |                                             |                                     |                                                 |
| 4   | 136.1                                       | C               |                                             |                                     |                                                 |
| 5   | 165.7*                                      | C               |                                             |                                     |                                                 |
| 6   | -                                           |                 |                                             |                                     |                                                 |
| 7   | 166.1*                                      | C               |                                             |                                     |                                                 |
| 8   | 98.4                                        | C               |                                             |                                     |                                                 |
| 9   | 165.8                                       | C               |                                             |                                     |                                                 |
| 10  | 118.8                                       | CH              | 6.93, s                                     |                                     | 8, 9, 12, 13                                    |
| 11  | 151.3                                       | C               |                                             |                                     |                                                 |
| 12  | 26.0                                        | CH <sub>3</sub> | 2.84, s                                     |                                     | 10, 11, 13                                      |
| 13  | 113.2                                       | C               |                                             |                                     |                                                 |
| 14  | 167.5                                       | C               |                                             |                                     |                                                 |
| 15  | -                                           |                 |                                             |                                     |                                                 |
| 16  | -                                           |                 |                                             |                                     |                                                 |
| 17  | -                                           |                 |                                             |                                     |                                                 |
| 18  | 21.4                                        | CH <sub>3</sub> | 1.87, s                                     | 21                                  | 19, 21, 22                                      |
| 19  | 61.6                                        | CH <sub>2</sub> | 4.26, s                                     |                                     | 18, 21, 22                                      |
| 20  | 67.1                                        | CH <sub>2</sub> | 5.00, d, 6.6                                | 18, 21                              | 14 (w), 21                                      |
| 21  | 120.3                                       | CH              | 5.71, br t, 6.6                             | 18, 20                              |                                                 |
| 22  | 143.4                                       | C               |                                             |                                     |                                                 |

w: weak signal; \*interchangeable

S5.  $^1\text{H}$  NMR spectrum (300 MHz, acetone- $d_6$ ) of compound 2. (*Z*)-coniosclerodinol

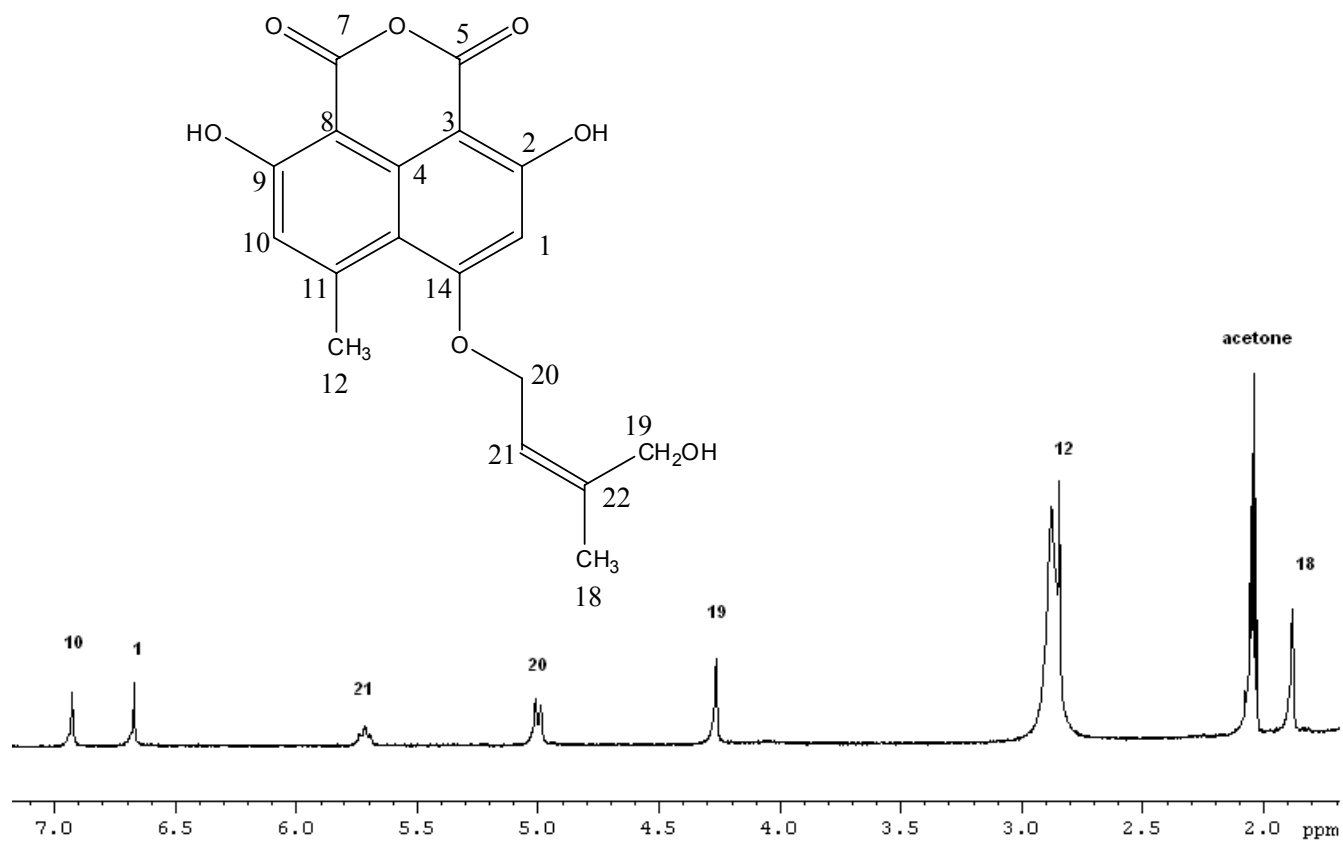

S6.  $^{13}\text{C}$  NMR (75 MHz, acetone- $d_6$ , upper line) and DEPT 135 (lower line) spectra of compound 2.

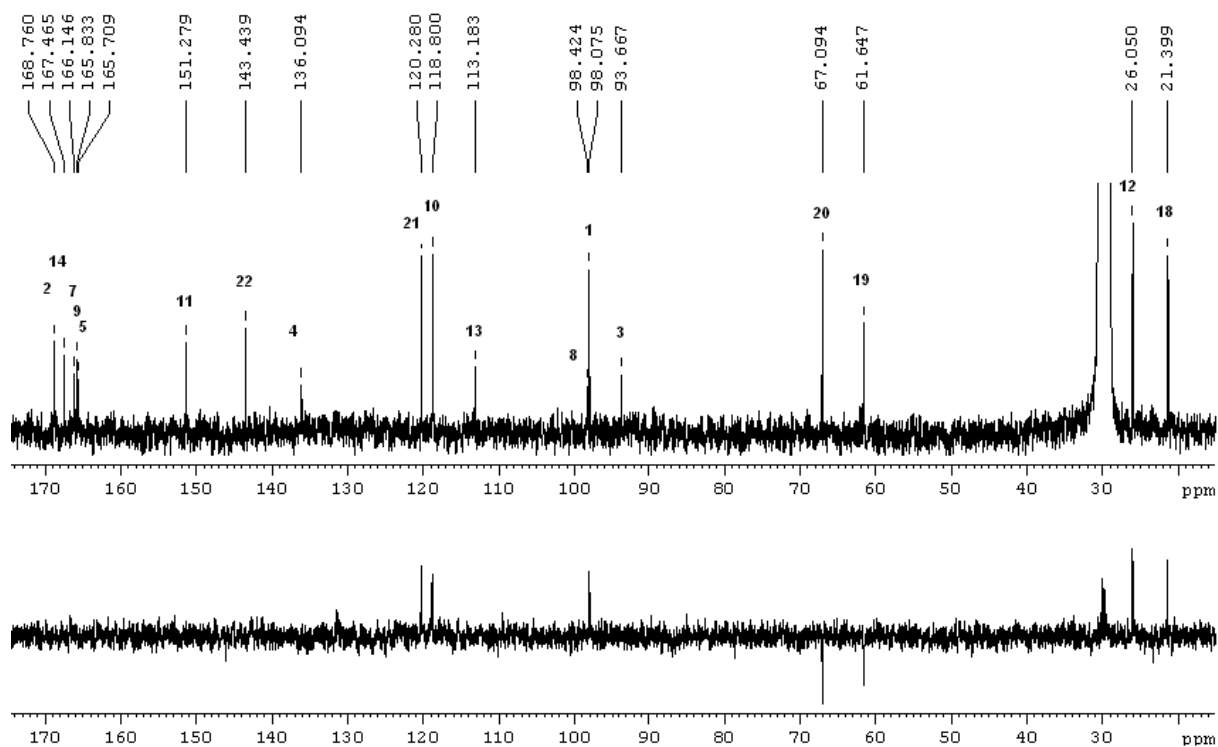

**S7.** NMR spectroscopic data of compound **3** in acetone-*d*<sub>6</sub>.

| No. | $\delta^{13}\text{C}$<br>(ppm) <sup>a</sup> | multiplicity    | $\delta^1\text{H}$ (ppm), <i>J</i><br>in Hz | $^1\text{H}$ - $^1\text{H}$<br>COSY | $^1\text{H}$ - $^{13}\text{C}$ HMBC<br>(H to C) |
|-----|---------------------------------------------|-----------------|---------------------------------------------|-------------------------------------|-------------------------------------------------|
| 1   | 98.1                                        | CH              | 6.70, s                                     |                                     | 2, 3, 5, 13, 14                                 |
| 2   | 168.8                                       | C               |                                             |                                     |                                                 |
| 3   | 93.9                                        | C               |                                             |                                     |                                                 |
| 4   | 136.1                                       | C               |                                             |                                     |                                                 |
| 5   | 165.6                                       | C               |                                             |                                     |                                                 |
| 6   | -                                           |                 |                                             |                                     |                                                 |
| 7   | n.d. <sup>b</sup>                           | C               |                                             |                                     |                                                 |
| 8   | 98.6                                        | C               |                                             |                                     |                                                 |
| 9   | 165.9                                       | C               |                                             |                                     |                                                 |
| 10  | 118.8                                       | CH              | 6.94, s                                     | 12                                  | 8, 9, 12, 13                                    |
| 11  | 151.3                                       | C               |                                             |                                     |                                                 |
| 12  | 26.1                                        | CH <sub>3</sub> | 2.86, s                                     | 10                                  | 10, 11, 13                                      |
| 13  | 113.4                                       | C               |                                             |                                     |                                                 |
| 14  | 167.7                                       | C               |                                             |                                     |                                                 |
| 15  | -                                           |                 |                                             |                                     |                                                 |
| 16  | -                                           |                 |                                             |                                     |                                                 |
| 17  | -                                           |                 |                                             |                                     |                                                 |
| 18  | 66.8                                        | CH <sub>2</sub> | 4.05, s                                     | 18, 20, 21                          | 18, 21, 22                                      |
| 19  | 14.3                                        | CH <sub>3</sub> | 1.81, s                                     | 19, 20, 21                          | 21, 22                                          |
| 20  | 67.5                                        | CH <sub>2</sub> | 4.99, d, 6.3                                | 18, 19, 21                          | 14, 21, 22                                      |
| 21  | 117.2                                       | CH              | 5.94, br t, 6.3                             | 18, 19, 20                          | 18, 20                                          |
| 22  | 143.5                                       | C               |                                             |                                     |                                                 |

<sup>a</sup>partly determined from  $^1\text{H}$ - $^{13}\text{C}$  HMBC cross peak correlations (500 MHz). <sup>b</sup>not detected

**S8.**  $^1\text{H}$  NMR spectrum (300 MHz, acetone- $d_6$ ) of compound **3**.

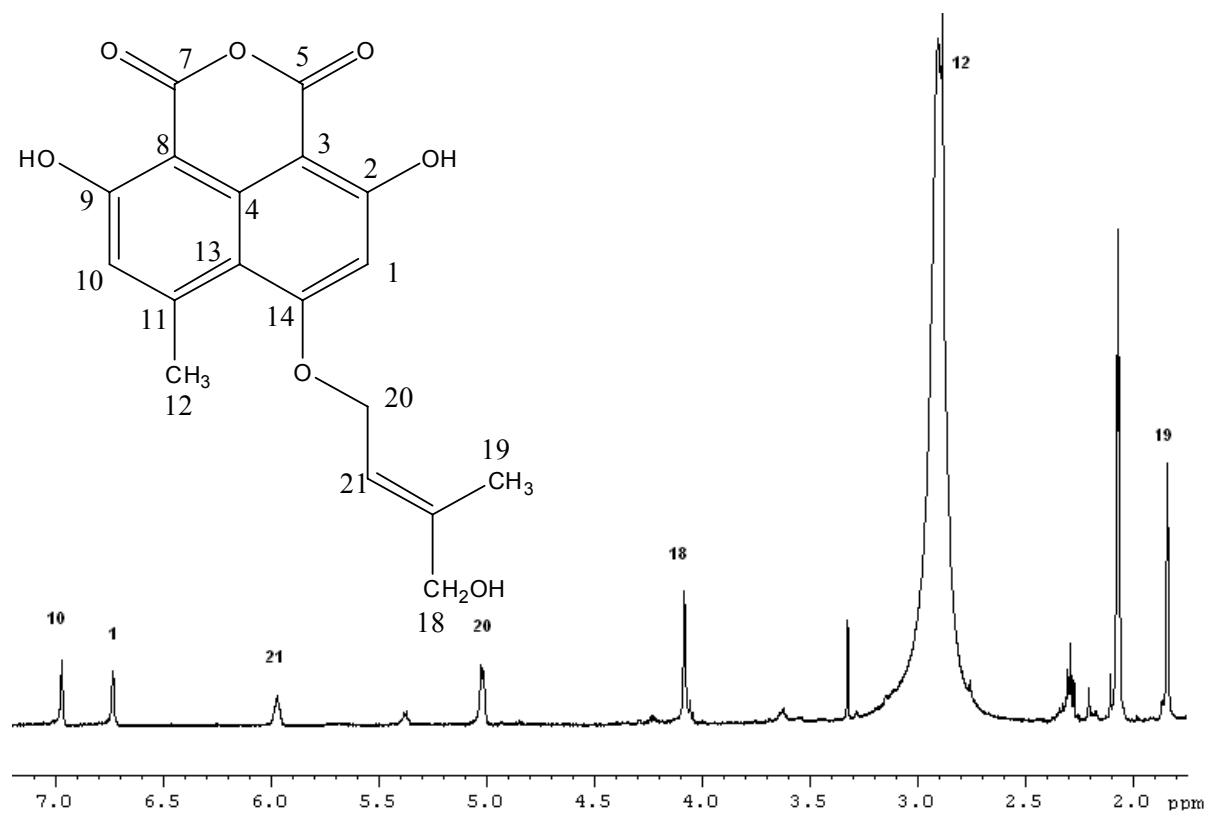

**S9.**  $^1\text{H}$   $^{13}\text{C}$  HMBC spectrum (500 MHz, acetone- $d_6$ ) of compound **3**.

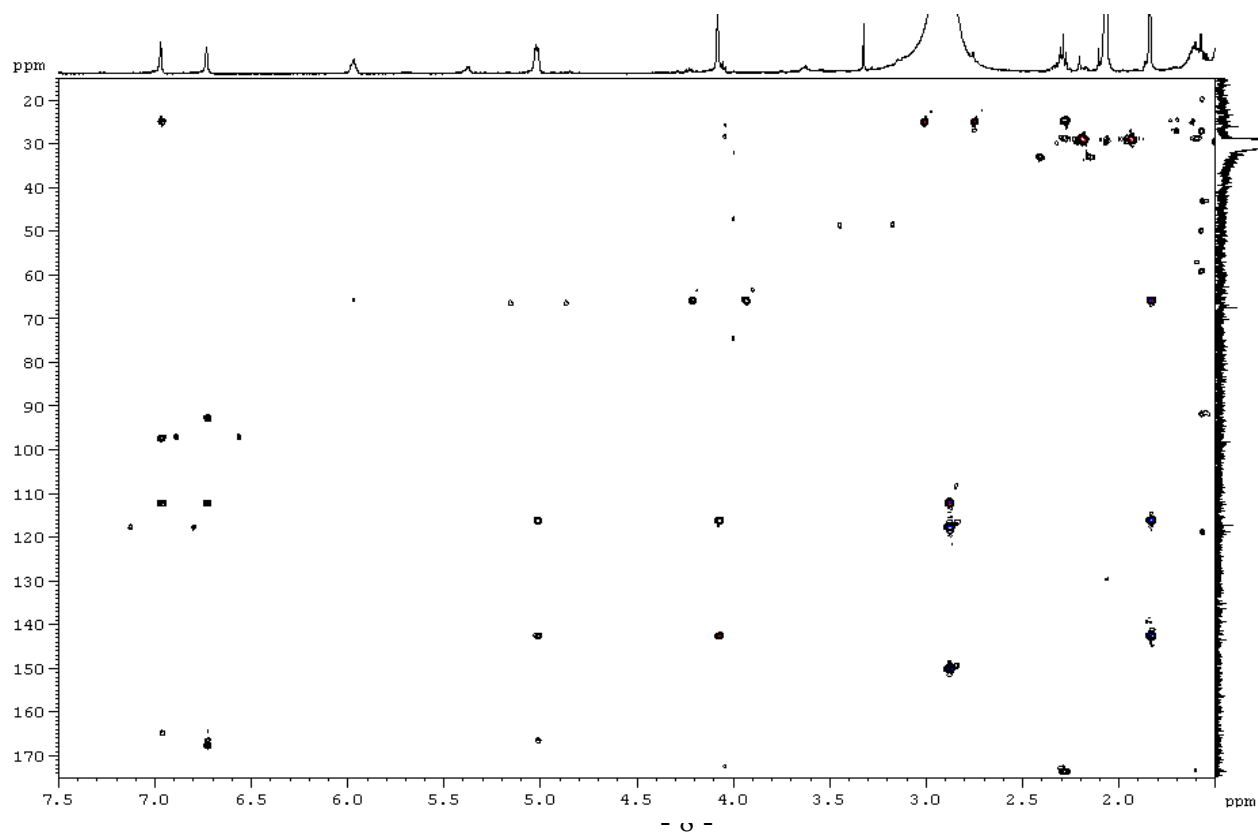



**S10.** NMR spectroscopic data of compound **4** in acetone-*d*<sub>6</sub>.

| No. | $\delta^{13}\text{C}$<br>(ppm) | multiplicity    | $\delta^1\text{H}$ (ppm), <i>J</i> in<br>Hz | $^1\text{H}$ - $^1\text{H}$<br>COSY | $^1\text{H}$ - $^{13}\text{C}$ HMBC<br>(H to C) | 2D-NOESY   |
|-----|--------------------------------|-----------------|---------------------------------------------|-------------------------------------|-------------------------------------------------|------------|
| 1   | 114.7                          | C               |                                             |                                     |                                                 |            |
| 2   | 164.0                          | C               |                                             |                                     |                                                 |            |
| 3   | 93.3                           | C               |                                             |                                     |                                                 |            |
| 4   | 135.6                          | C               |                                             |                                     |                                                 |            |
| 5   | 164.8*                         | C               |                                             |                                     |                                                 |            |
| 6   | -                              |                 |                                             |                                     |                                                 |            |
| 7   | 165.2*                         | C               |                                             |                                     |                                                 |            |
| 8   | 97.2                           | C               |                                             |                                     |                                                 |            |
| 9   | 166.1                          | C               |                                             |                                     |                                                 |            |
| 10  | 117.5                          | CH              | 6.82, s                                     | 12                                  | 8, 9, 12, 13                                    | 12         |
| 11  | 150.1                          | C               |                                             |                                     |                                                 |            |
| 12  | 23.8                           | CH <sub>3</sub> | 2.80, s                                     | 10                                  | 10, 11, 13                                      | 10         |
| 13  | 108.5                          | C               |                                             |                                     |                                                 |            |
| 14  | 167.4                          | C               |                                             |                                     |                                                 |            |
| 15  | 91.9                           | CH              | 4.77, q, 6.6                                | 16                                  | 17, 18, 19                                      | 16, 18     |
| 16  | 14.5                           | CH <sub>3</sub> | 1.65, d, 6.6                                | 15                                  | 15, 17                                          | 15         |
| 17  | 48.8                           | C               |                                             |                                     |                                                 |            |
| 18  | 20.8                           | CH <sub>3</sub> | 1.49, s                                     |                                     | 1, 15, 17, 19                                   | 15         |
| 19  | 64.5                           | CH <sub>2</sub> | a: 3.96, d, 11.7<br>b: 3.86, d, 11.7        | 19b<br>19a                          | 1, 15, 17, 18<br>1, 15, 17, 18                  | 19b<br>19a |
|     | OH-2                           |                 | 11.72, s                                    |                                     |                                                 |            |
|     | OH-9                           |                 | 11.37, s                                    |                                     |                                                 |            |

\*interchangeable

**S11.**  $^1\text{H}$  NMR spectrum (300 MHz,  $\text{CDCl}_3$ ) of compound **4**.

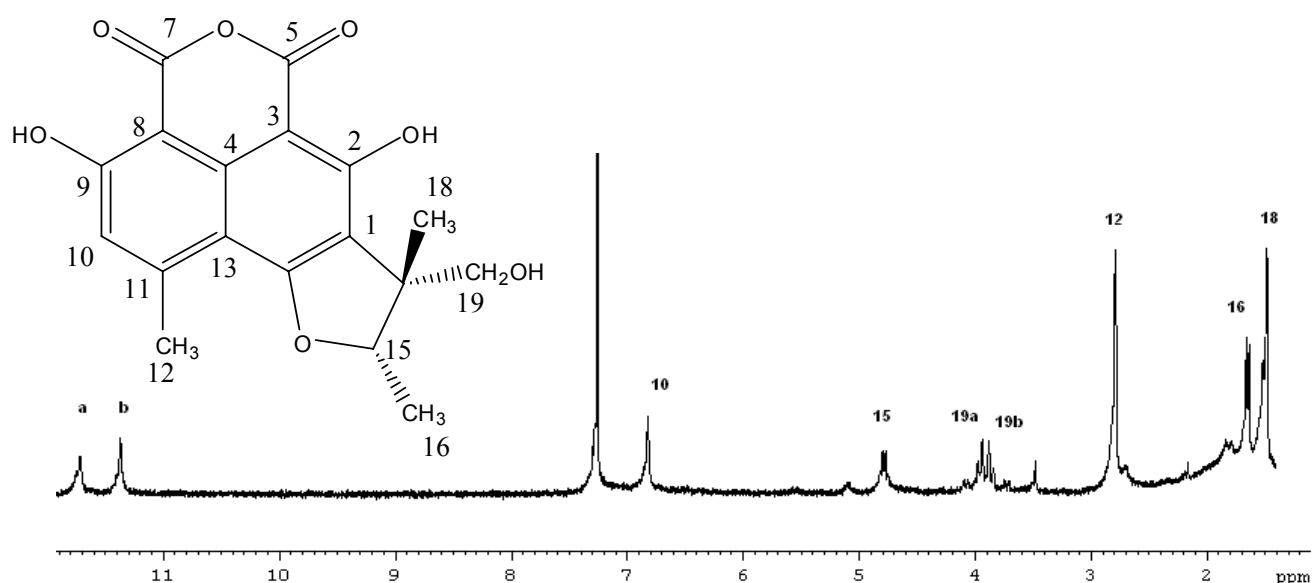

**S12.**  $^{13}\text{C}$  NMR (75 MHz,  $\text{CDCl}_3$ , upper line) and DEPT 135 (lower line) spectra of compound **4**.

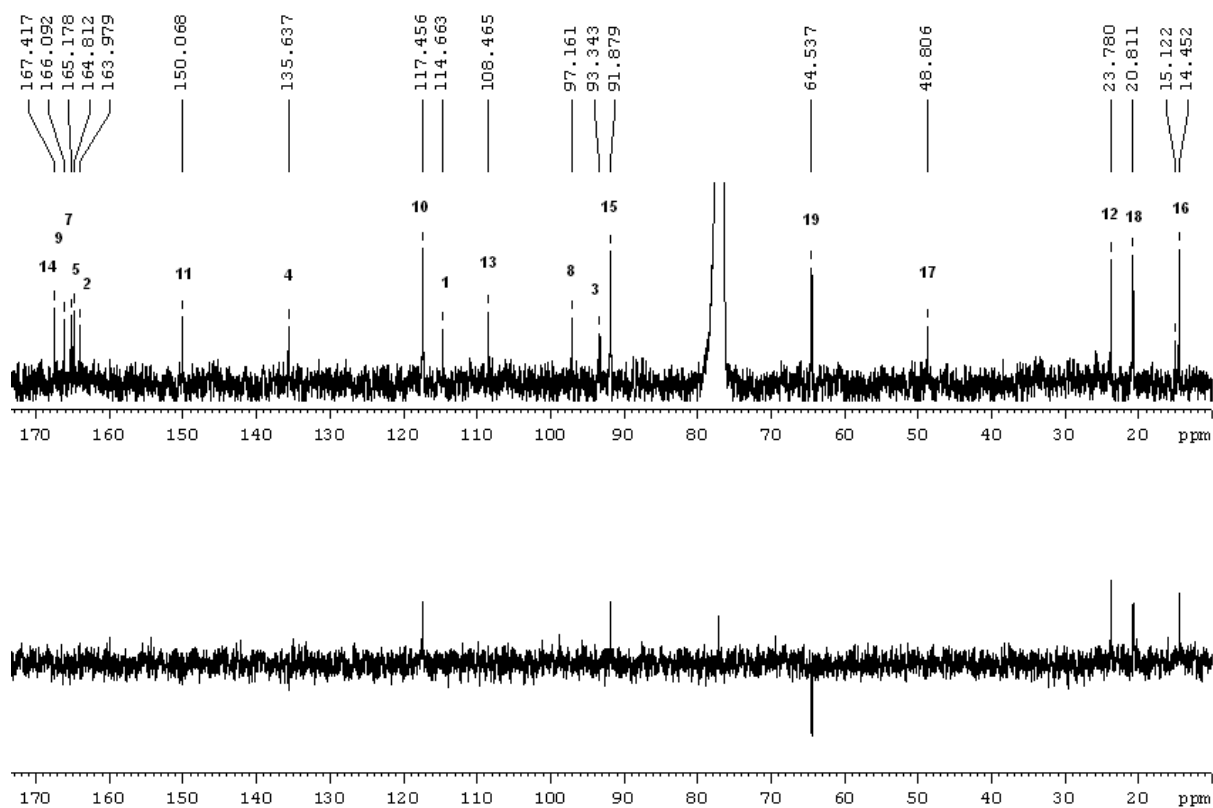

**S13.** NMR spectroscopic data of compound **5** in acetone-*d*<sub>6</sub>.

| No. | $\delta^{13}\text{C}$ (ppm) | multiplicity <sup>a</sup> | $\delta^1\text{H}$ (ppm), <i>J</i> in Hz | <sup>1</sup> H- <sup>1</sup> H COSY | <sup>1</sup> H- <sup>13</sup> C HMBC (H to C) |
|-----|-----------------------------|---------------------------|------------------------------------------|-------------------------------------|-----------------------------------------------|
| 1   | 97.5                        | CH                        | 6.56, s                                  |                                     | 13                                            |
| 2   | 171.6*                      | C                         |                                          |                                     |                                               |
| 3   | 106.5                       | C                         |                                          |                                     |                                               |
| 4   | 122.9                       | C                         |                                          |                                     |                                               |
| 5   | 172.6*                      | C                         |                                          |                                     |                                               |
| 6   | 155.8                       | C                         |                                          |                                     |                                               |
| 7   | -                           |                           |                                          |                                     |                                               |
| 8   | 131.3                       | C                         |                                          |                                     |                                               |
| 9   | 146.1                       | C                         |                                          |                                     |                                               |
| 10  | 119.6                       | CH                        | 6.93, s                                  |                                     |                                               |
| 11  | 137.3                       | C                         |                                          |                                     |                                               |
| 12  | 24.7                        | CH <sub>3</sub>           | 2.70, s                                  |                                     | 10, 11, 13                                    |
| 13  | 113.1                       | C                         |                                          |                                     |                                               |
| 14  | 170.2*                      | C                         |                                          |                                     |                                               |
| 15  | -                           |                           |                                          |                                     |                                               |
| 16  | -                           |                           |                                          |                                     |                                               |
| 17  | -                           |                           |                                          |                                     |                                               |
| 18  | 25.8                        | CH <sub>3</sub>           | 1.83, s                                  | 20, 21                              | 19, 21, 22                                    |
| 19  | 18.3                        | CH <sub>3</sub>           | 1.83, s                                  | 20, 21                              | 18, 21, 22                                    |
| 20  | 67.9                        | CH <sub>2</sub>           | 4.91, d, 6.6                             | 18, 19, 21                          | 18, 22                                        |
| 21  | 118.9                       | CH                        | 5.66, br t, 6.6                          | 18, 19, 20                          |                                               |
| 22  | 140.5                       | C                         |                                          |                                     |                                               |

\*interchangeable

**S14.**  $^1\text{H}$  NMR spectrum (300 MHz, acetone- $d_6$ ) of compound **5**.

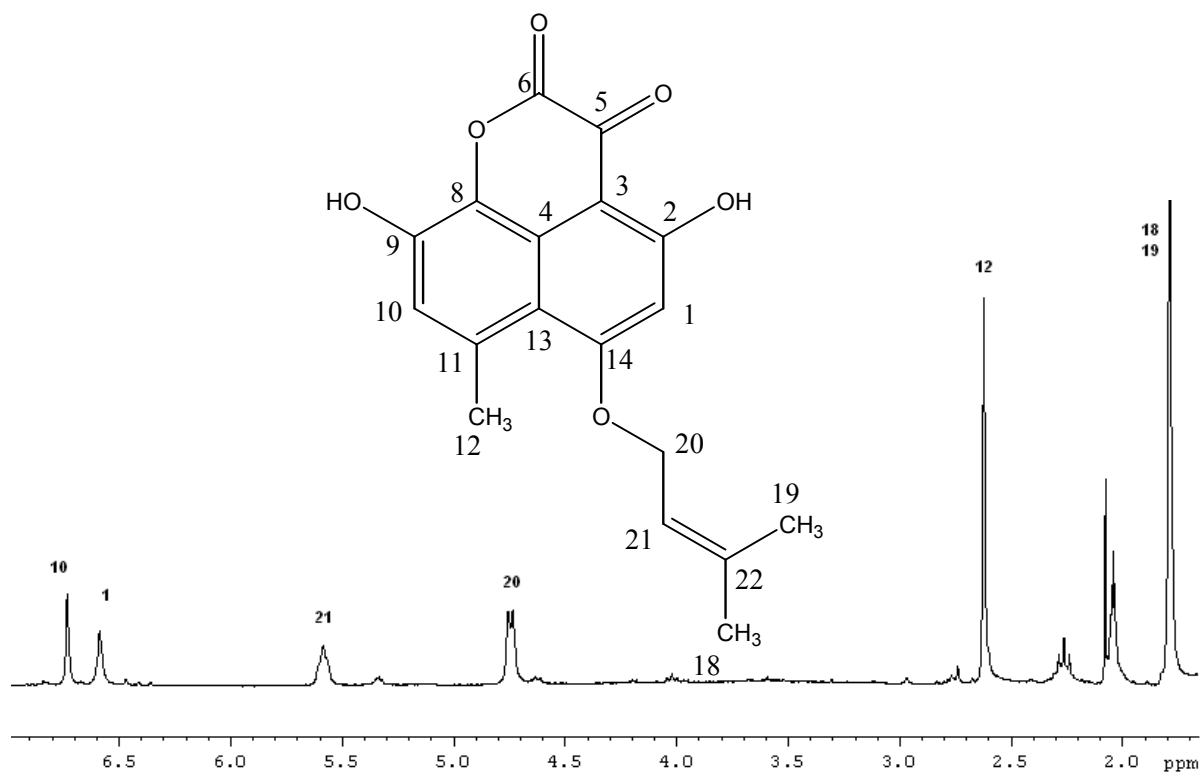

**S15.**  $^{13}\text{C}$  NMR (75 MHz, acetone- $d_6$ , upper line) and DEPT 135 (lower line) spectra of compound **5**.

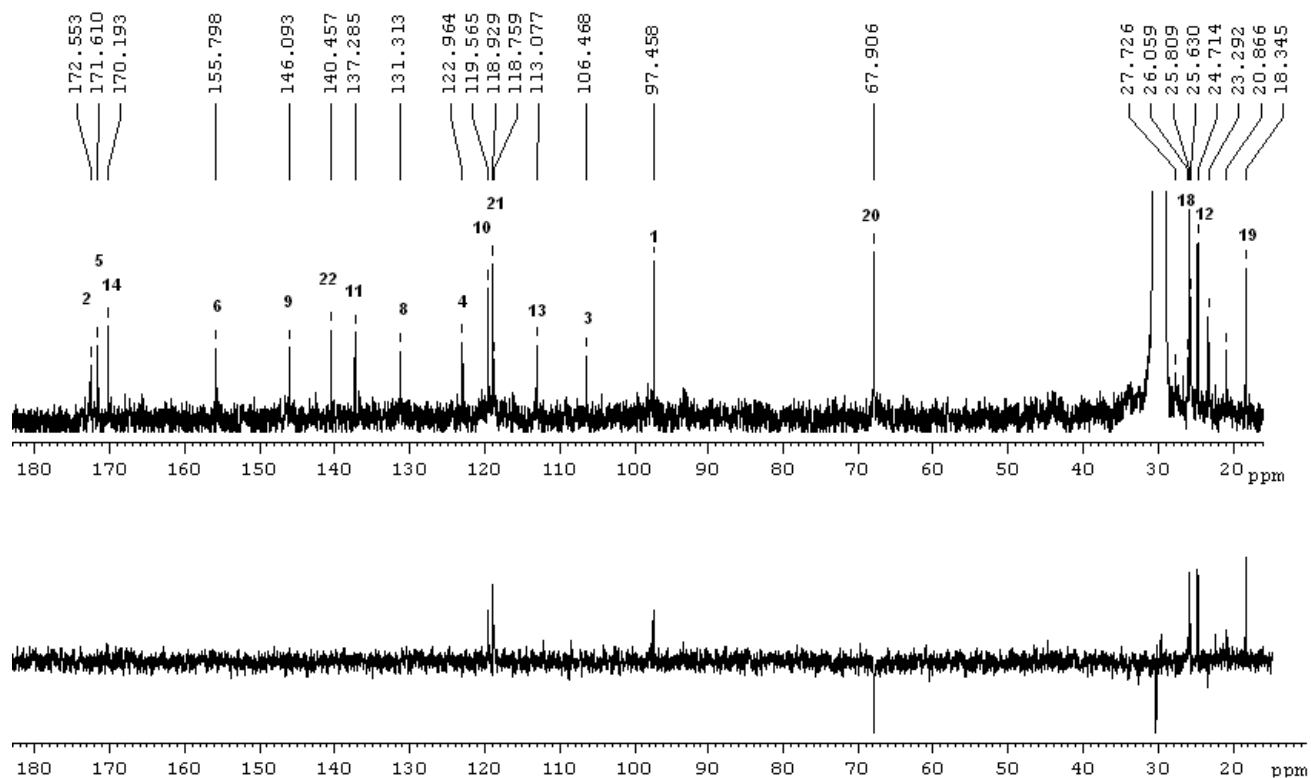

**S16.** NMR spectroscopic data of compound **6** in acetone-*d*<sub>6</sub>.

| No. | $\delta^{13}\text{C}$<br>(ppm) | multiplicity <sup>a</sup> | $\delta^1\text{H}$ (ppm), <i>J</i><br>in Hz | $^1\text{H}$ - $^1\text{H}$<br>COSY | $^1\text{H}$ - $^{13}\text{C}$ HMBC<br>(H to C) |
|-----|--------------------------------|---------------------------|---------------------------------------------|-------------------------------------|-------------------------------------------------|
| 1   | 98.2                           | CH                        | 6.46, s                                     |                                     | 2, 3, 13                                        |
| 2   | 157.8                          | C                         |                                             |                                     |                                                 |
| 3   | 105.7                          | C                         |                                             |                                     |                                                 |
| 4   | 152.5                          | C                         |                                             |                                     |                                                 |
| 5   | 185.4*                         | C                         |                                             |                                     |                                                 |
| 6   | -                              |                           |                                             |                                     |                                                 |
| 7   | 187.7*                         | C                         |                                             |                                     |                                                 |
| 8   | 108.8                          | C                         |                                             |                                     |                                                 |
| 9   | 155.2                          | C                         |                                             |                                     |                                                 |
| 10  | 119.2                          | CH                        | 6.72, s                                     |                                     | 8, 12, 13                                       |
| 11  | 147.2                          | C                         |                                             |                                     |                                                 |
| 12  | 24.1                           | CH <sub>3</sub>           | 2.73, s                                     |                                     | 10, 11, 13                                      |
| 13  | 113.0                          | C                         |                                             |                                     |                                                 |
| 14  | 165.3                          | C                         |                                             |                                     |                                                 |
| 15  |                                |                           |                                             |                                     |                                                 |
| 16  |                                |                           |                                             |                                     |                                                 |
| 17  |                                |                           |                                             |                                     |                                                 |
| 18  | 25.8                           | CH <sub>3</sub>           | 1.80, s                                     | 19, 20, 21                          | 19, 21, 22                                      |
| 19  | 18.3                           | CH <sub>3</sub>           | 1.80, s                                     | 18, 20, 21                          | 18, 21, 22                                      |
| 20  | 66.9                           | CH <sub>2</sub>           | 4.77, d, 6.3                                | 18, 19, 21                          | 14, 21, 22                                      |
| 21  | 119.5                          | CH                        | 5.61, br t, 6.3                             | 18, 19, 20                          | 18, 19                                          |
| 22  | 139.7                          | C                         |                                             |                                     |                                                 |

\*interchangeable

**S17.**  $^1\text{H}$  NMR spectrum (300 MHz, acetone- $d_6$ ) of compound **6**.

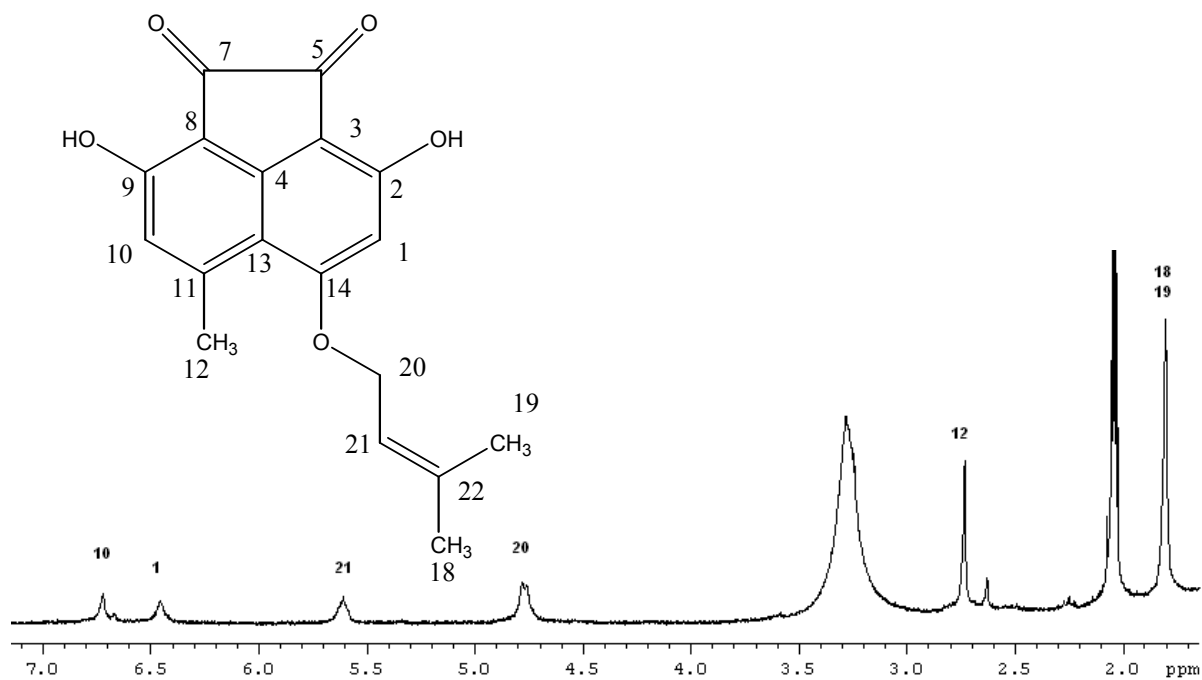

**S18.**  $^{13}\text{C}$  NMR (75 MHz, acetone- $d_6$ , upper line) and DEPT 135 (lower line) spectra of compound **6**.

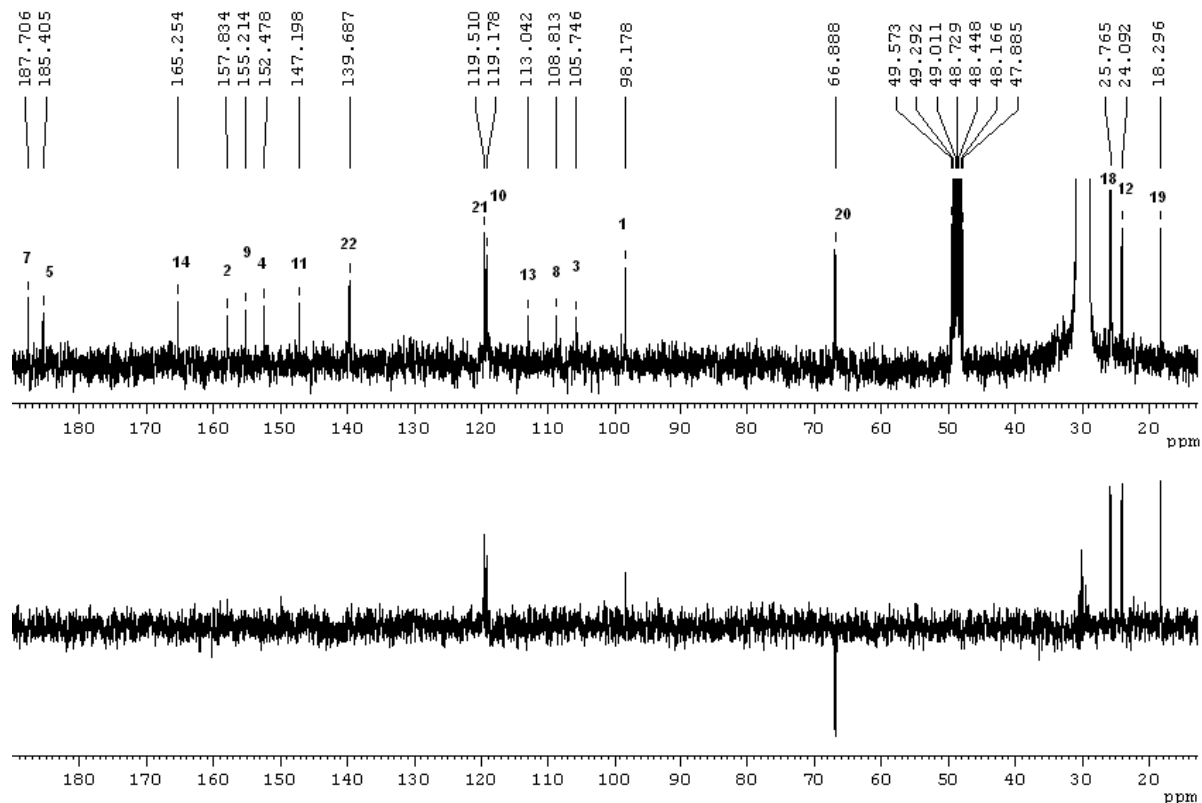

**S19.** NMR spectroscopic data of compound **7** in dms-*d*<sub>6</sub>.

| No.  | $\delta^{13}\text{C}$<br>(ppm) | multiplicity    | $\delta^1\text{H}$ (ppm), <i>J</i><br>in Hz | $^1\text{H}$ - $^1\text{H}$<br>COSY | $^1\text{H}$ - $^{13}\text{C}$<br>HMBC (H to<br>C) |
|------|--------------------------------|-----------------|---------------------------------------------|-------------------------------------|----------------------------------------------------|
| 1    | 98.4                           | CH              | 6.47, s                                     |                                     | 2, 3, 13, 14                                       |
| 2    | 160.8                          | C               |                                             |                                     |                                                    |
| 3    | 93.5                           | C               |                                             |                                     |                                                    |
| 4    | 133.7                          | C               |                                             |                                     |                                                    |
| 5    | 164.44*                        | C               |                                             |                                     |                                                    |
| 6    | -                              |                 |                                             |                                     |                                                    |
| 7    | -                              | C               |                                             |                                     |                                                    |
| 8    | 128.8                          | C               |                                             |                                     |                                                    |
| 9    | 137.8                          | C               |                                             |                                     |                                                    |
| 10   | 118.6                          | CH              | 6.67, s                                     | 12                                  | 8, 9, 12, 13                                       |
| 11   | 131.5                          | C               |                                             |                                     |                                                    |
| 12   | 21.5                           | CH <sub>3</sub> | 2.58, s                                     | 10                                  | 10, 11, 13, 14                                     |
| 13   | 109.6                          | C               |                                             |                                     |                                                    |
| 14   | 164.37*                        | C               |                                             |                                     |                                                    |
| 15   | -                              |                 |                                             |                                     |                                                    |
| 16   | -                              |                 |                                             |                                     |                                                    |
| 17   | -                              |                 |                                             |                                     |                                                    |
| 18   | 25.5                           | CH <sub>3</sub> | 1.78, s                                     |                                     | 19, 21, 22                                         |
| 19   | 18.2                           | CH <sub>3</sub> | 1.75, s                                     |                                     | 18, 21, 22                                         |
| 20   | 65.8                           | CH <sub>2</sub> | 4.71, d, 6.6                                | 21                                  | 14, 21, 22                                         |
| 21   | 118.7                          | CH              | 5.54, br t, 6.6                             | 18, 19, 20                          | 18, 19                                             |
| 22   | 138.6                          | C               |                                             |                                     |                                                    |
| OH-2 |                                |                 | 10.47, s                                    |                                     |                                                    |

\*interchangeable

**S20.**  $^1\text{H}$  NMR spectrum (300 MHz,  $\text{dms}\text{-}d_6$ ) of compound 7.

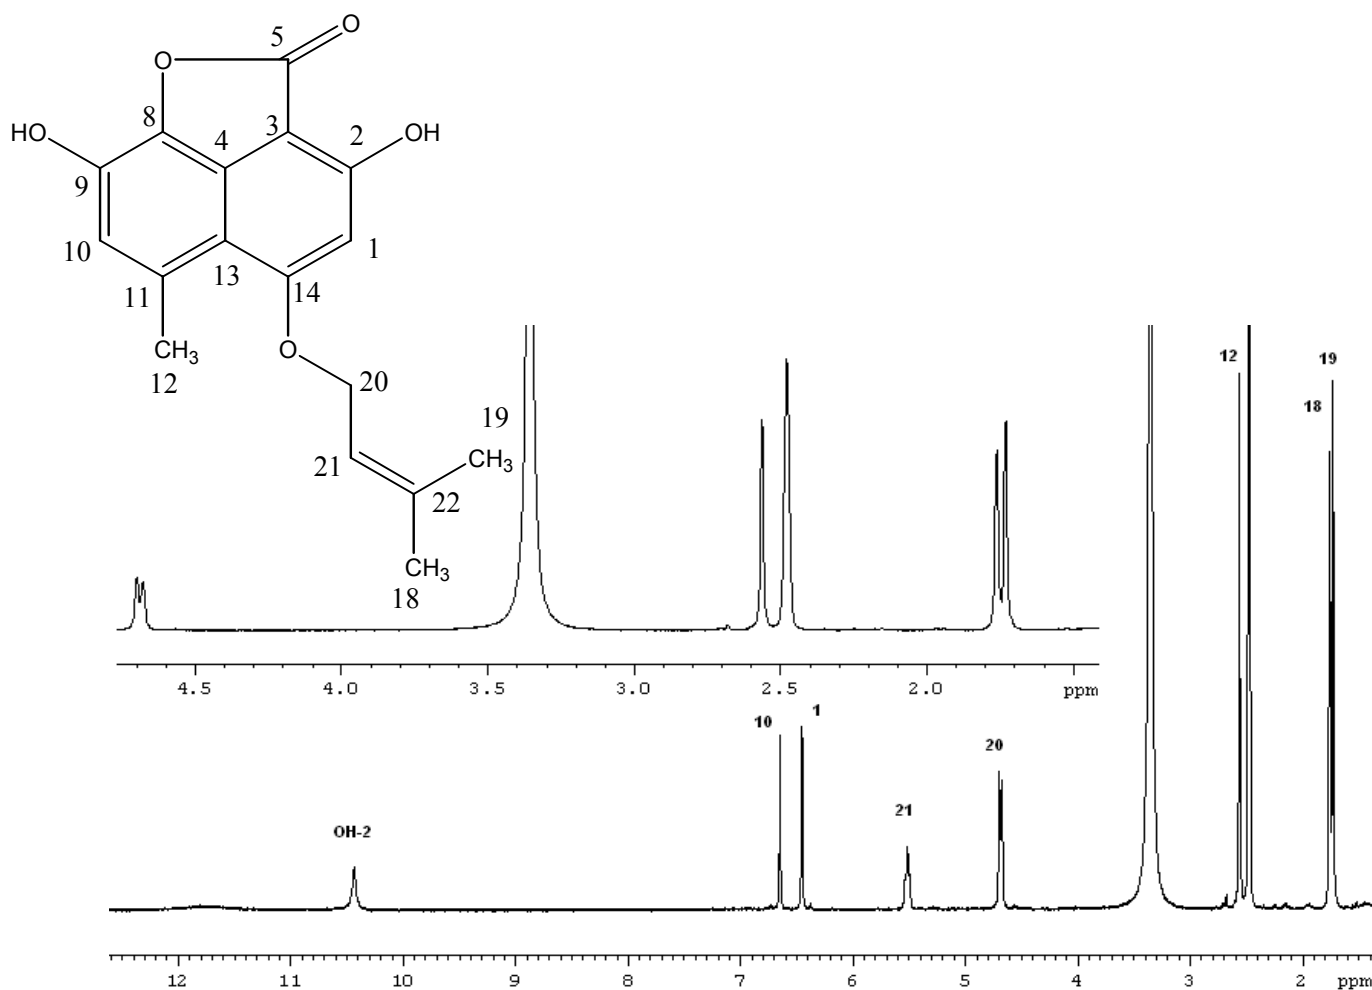

**S21.**  $^{13}\text{C}$  NMR (75 MHz,  $\text{dms}\text{-}d_6$ , upper line) and DEPT 135 (lower line) spectra of compound 7.

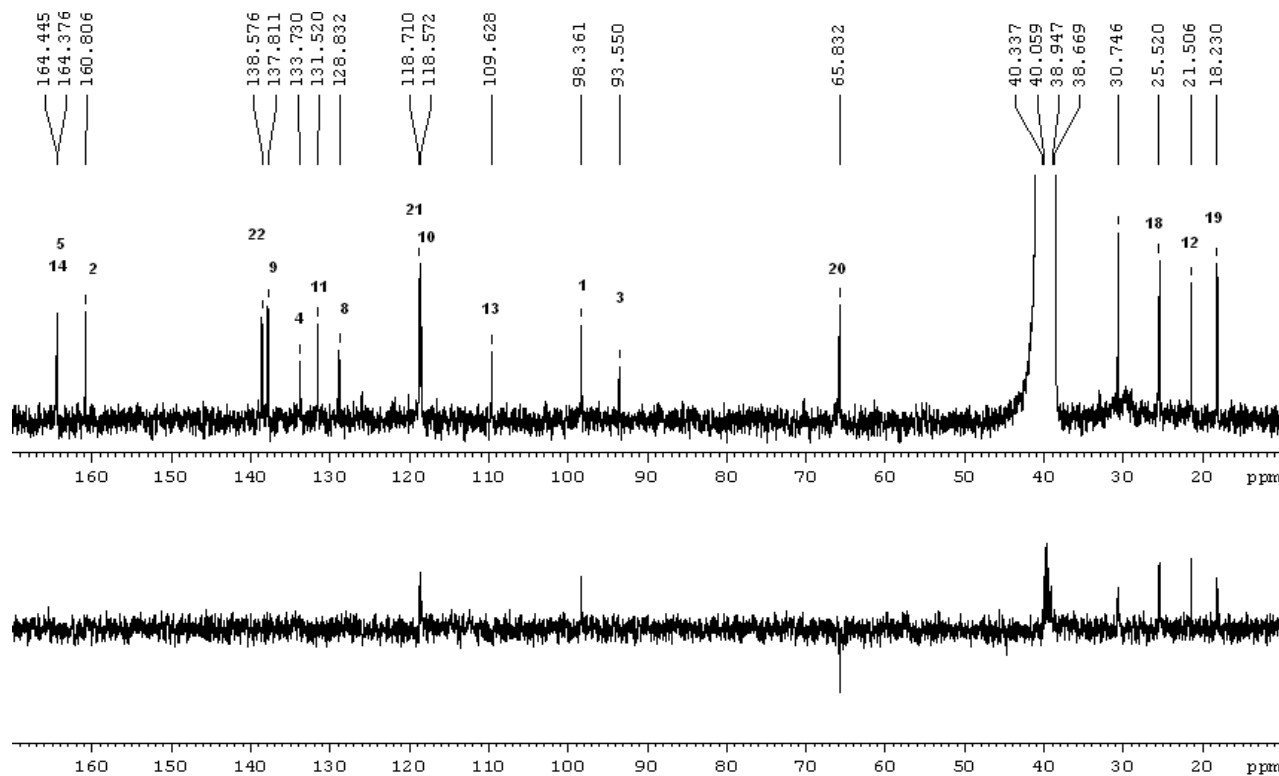



S22.  $^1\text{H}$  NMR spectrum (300 MHz,  $\text{CDCl}_3$ ) of compound **8**.

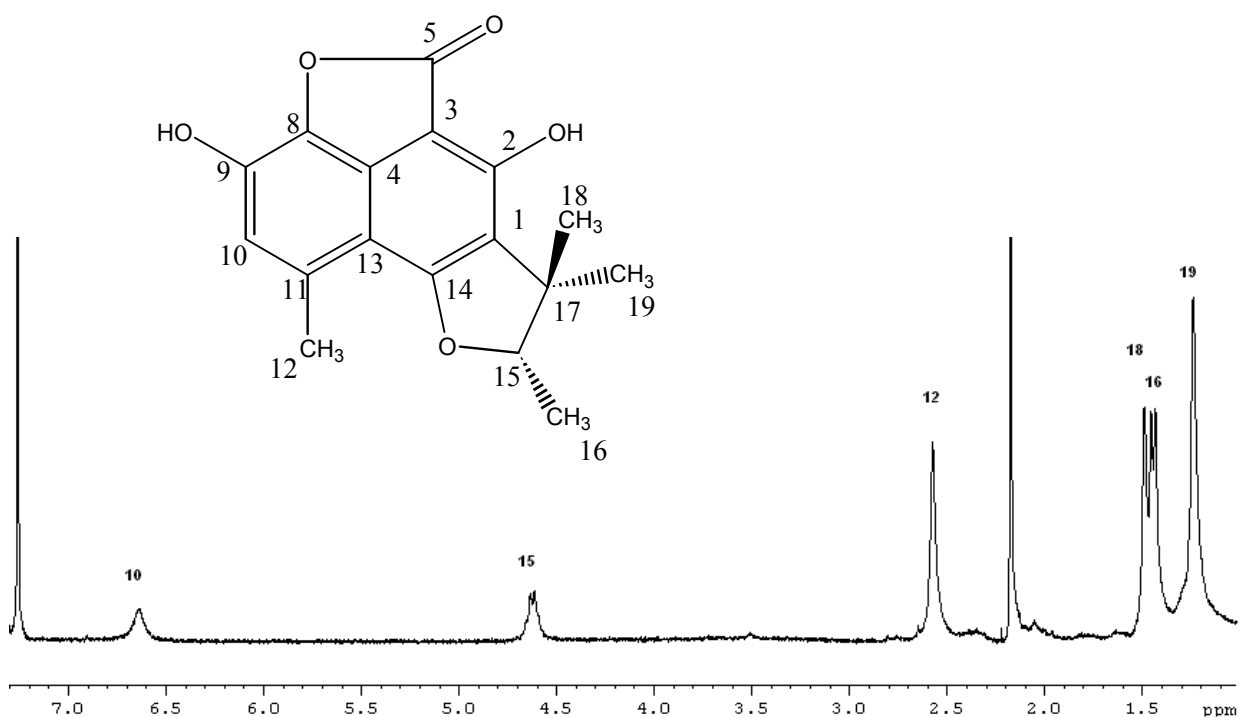

S23.  $^{13}\text{C}$  NMR (75 MHz,  $\text{CDCl}_3$ , upper line) and DEPT 135 (lower line) spectra of compound **8**.

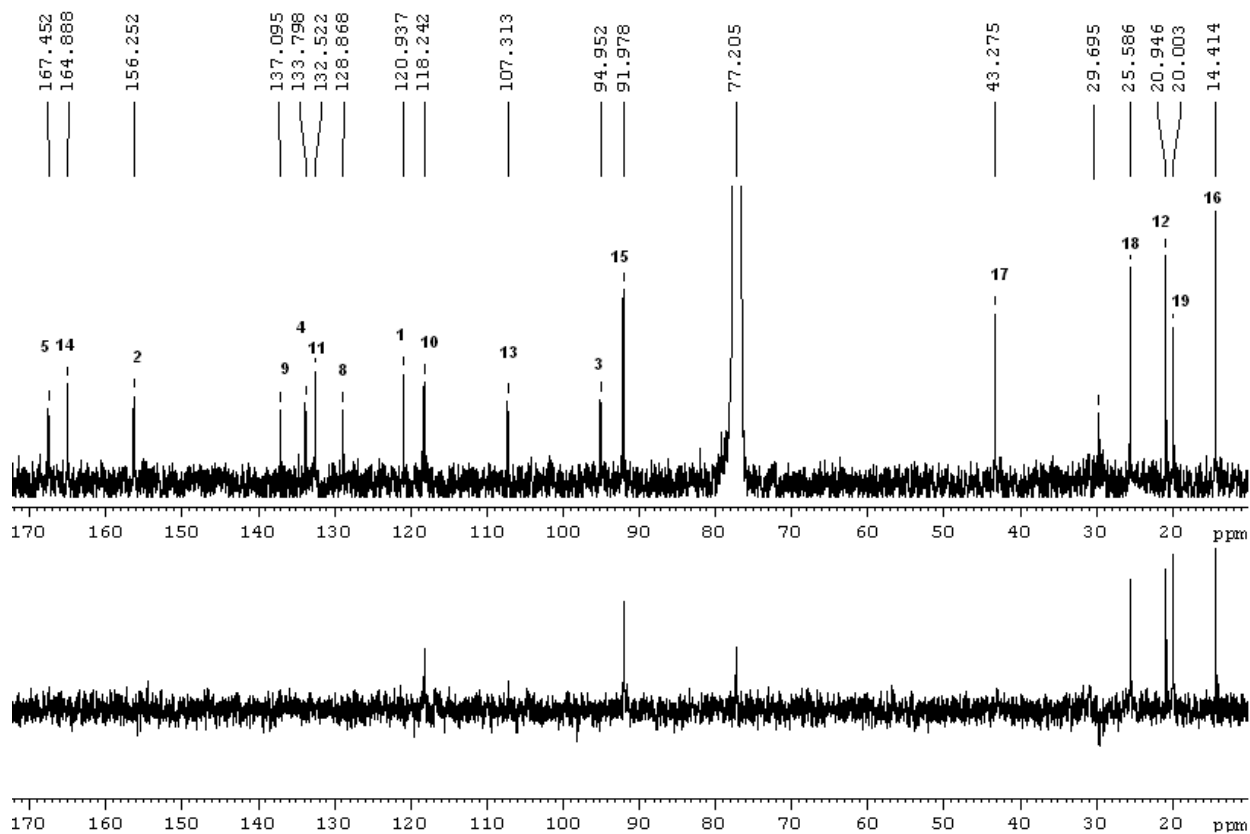

S24.  $^1\text{H}$  NMR spectrum (300 MHz,  $\text{CDCl}_3$ ) of compound **9**.

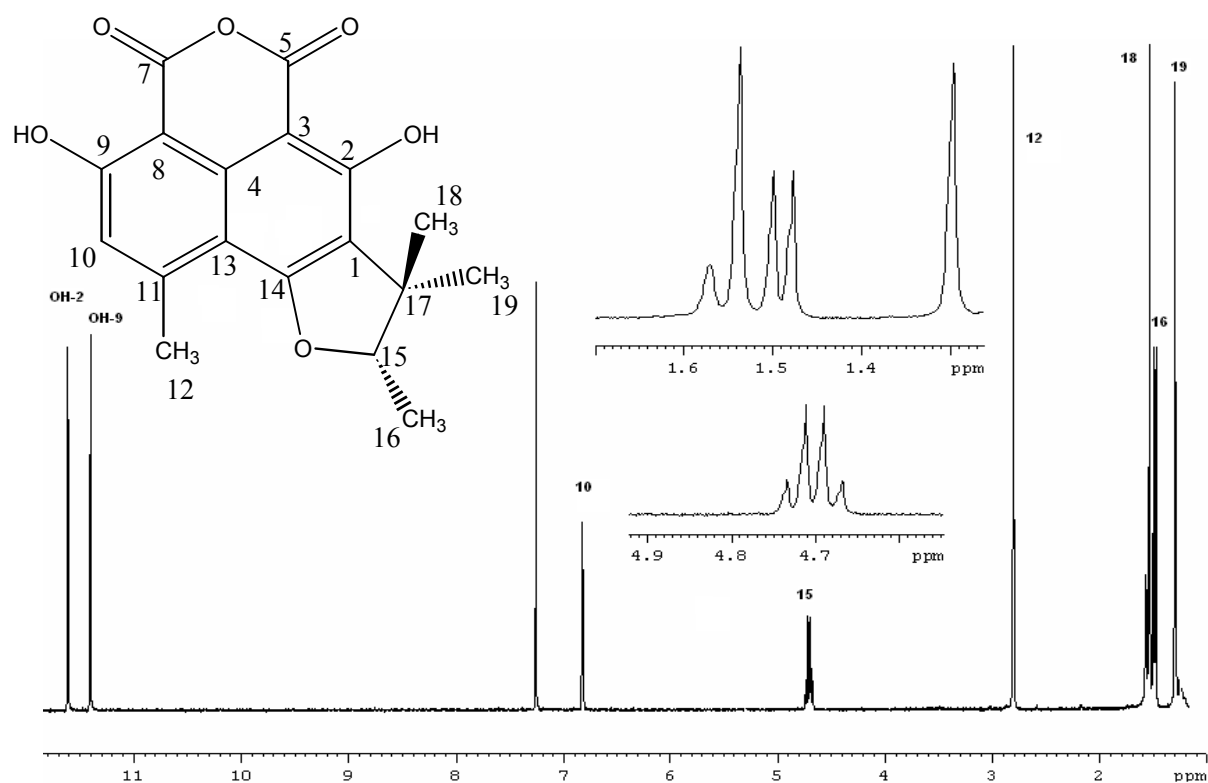

S25.  $^{13}\text{C}$  NMR (75 MHz,  $\text{CDCl}_3$ , upper line) and DEPT 135 (lower line) spectra of compound **9**.

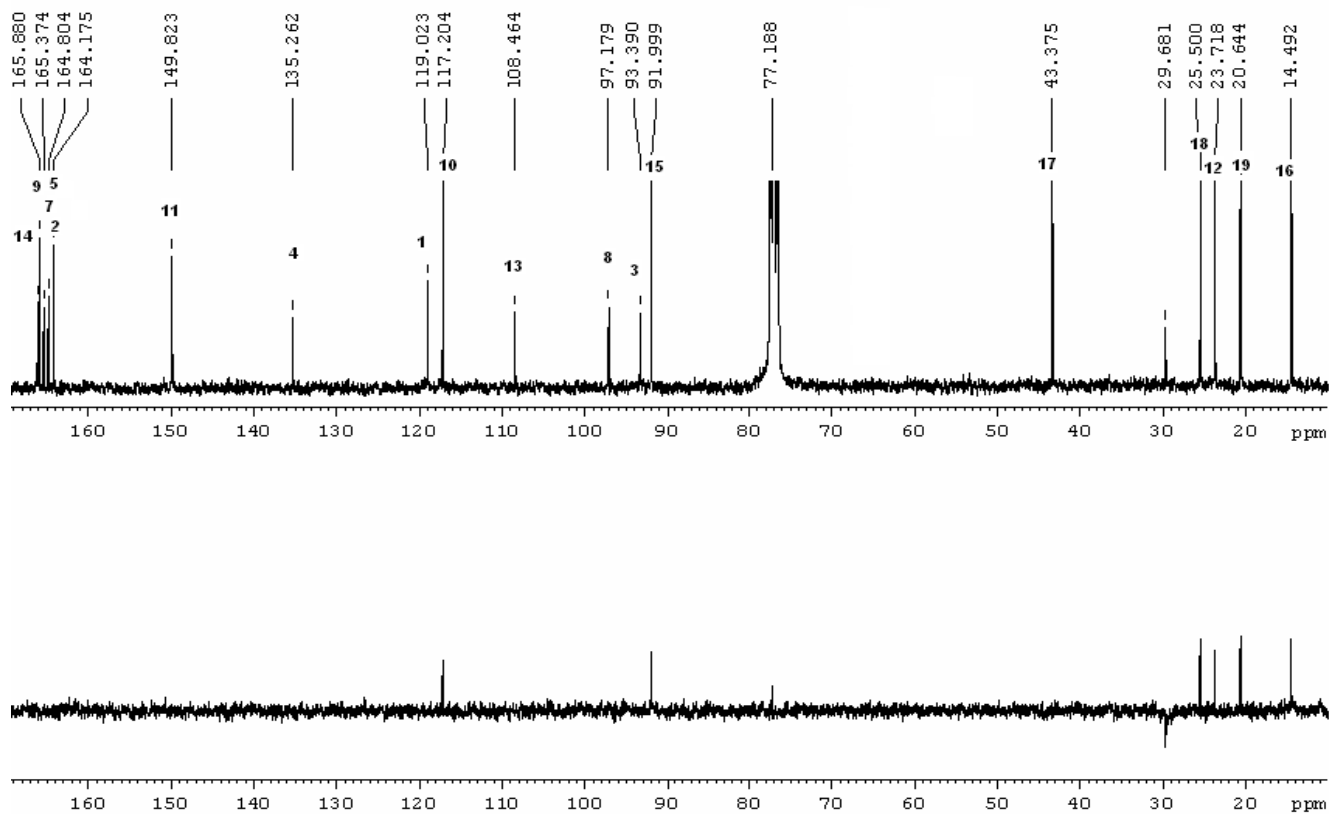

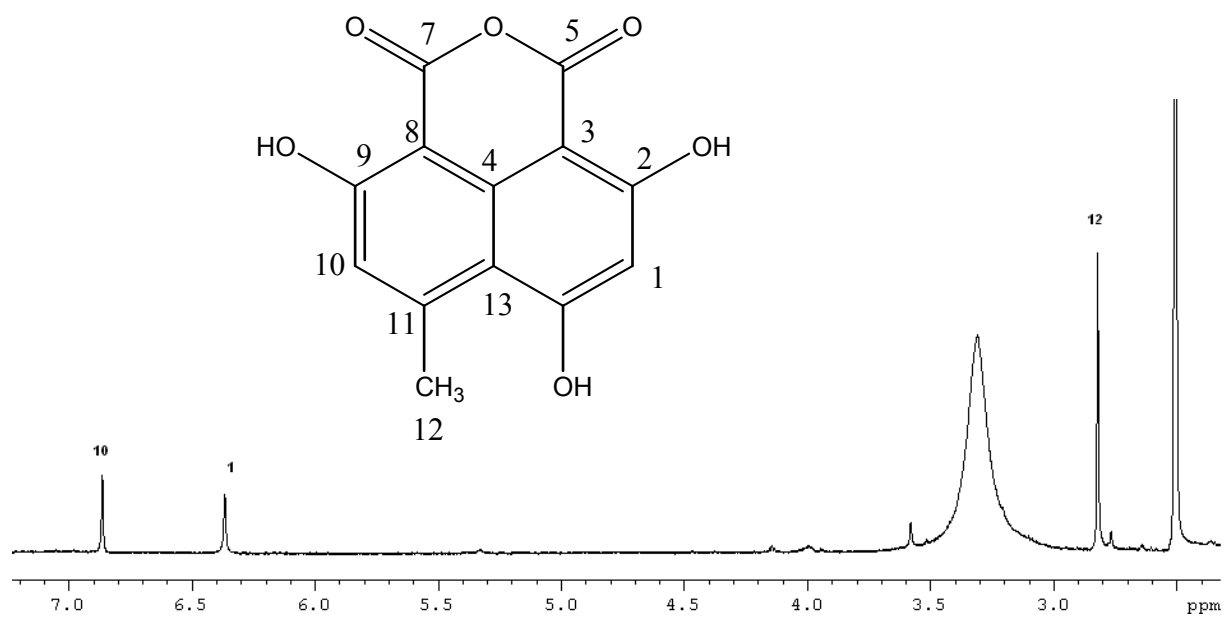

**S27.** <sup>1</sup>H NMR spectrum (300 MHz, acetone-*d*<sub>6</sub>) of compound **11**.

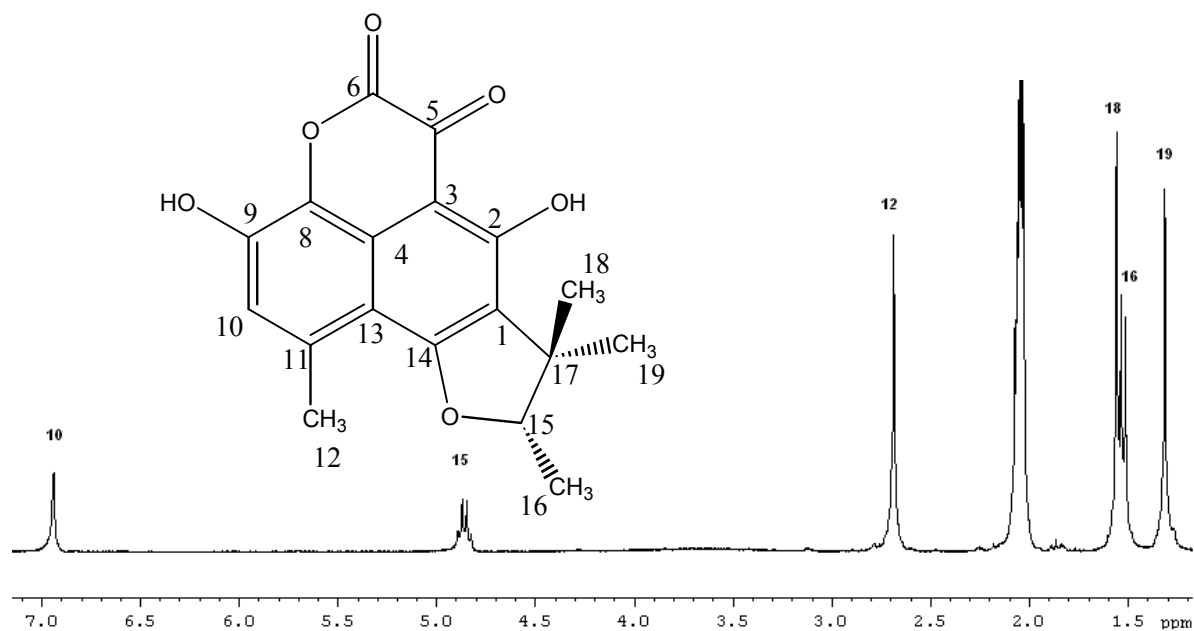

**S28.**  $^{13}\text{C}$  NMR (75 MHz, acetone- $d_6$ , upper line) and DEPT 135 (lower line) spectra of compound 11.

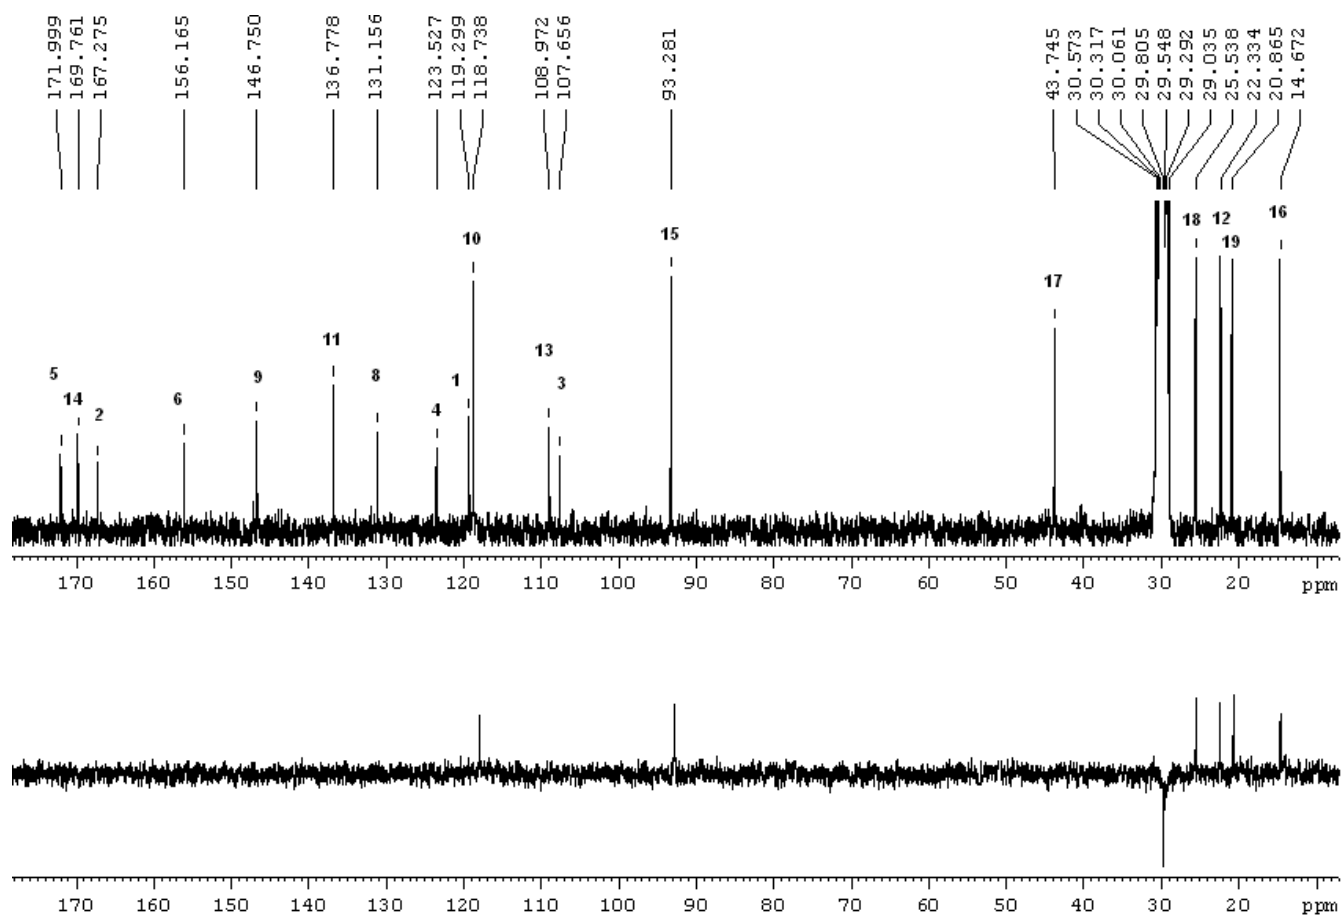

**S29.**  $^1\text{H}$  NMR spectrum (300 MHz, acetone- $d_6$ ) of compound 12.

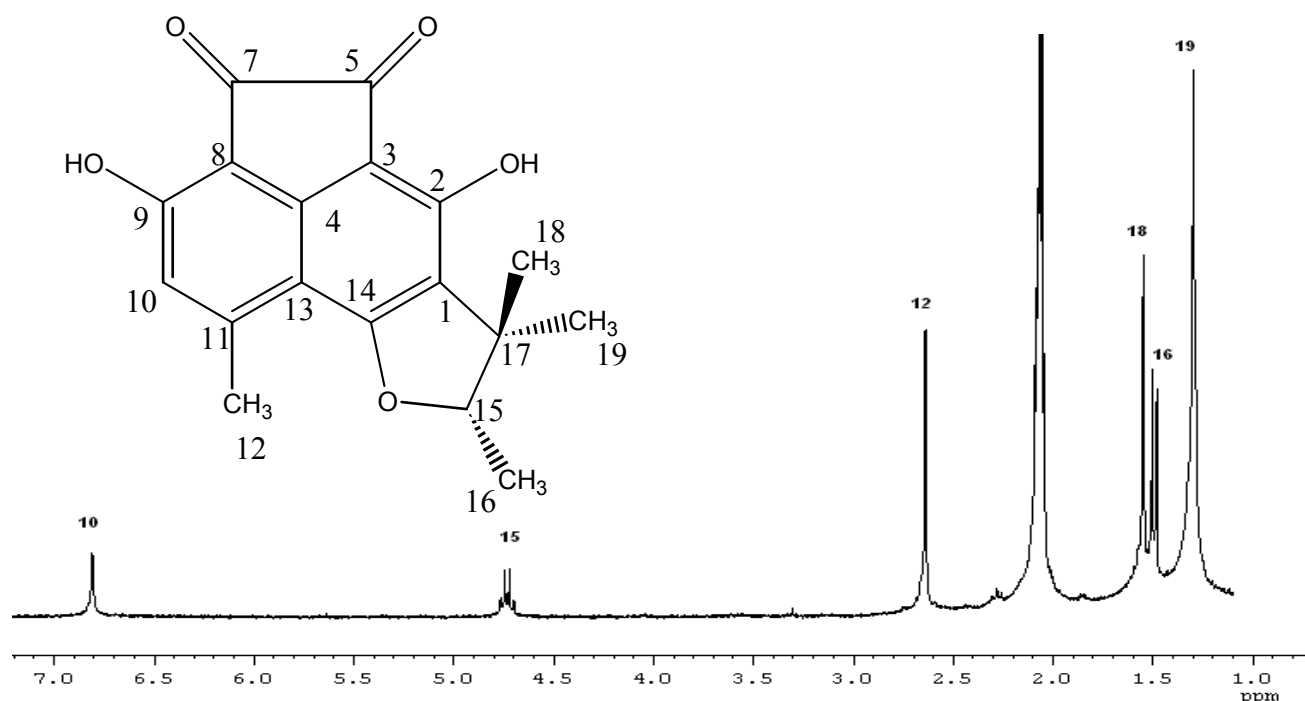

**S30.** <sup>13</sup>C NMR (75 MHz, acetone-*d*<sub>6</sub>, upper line) and DEPT 135 (lower line) spectra of compound 12.

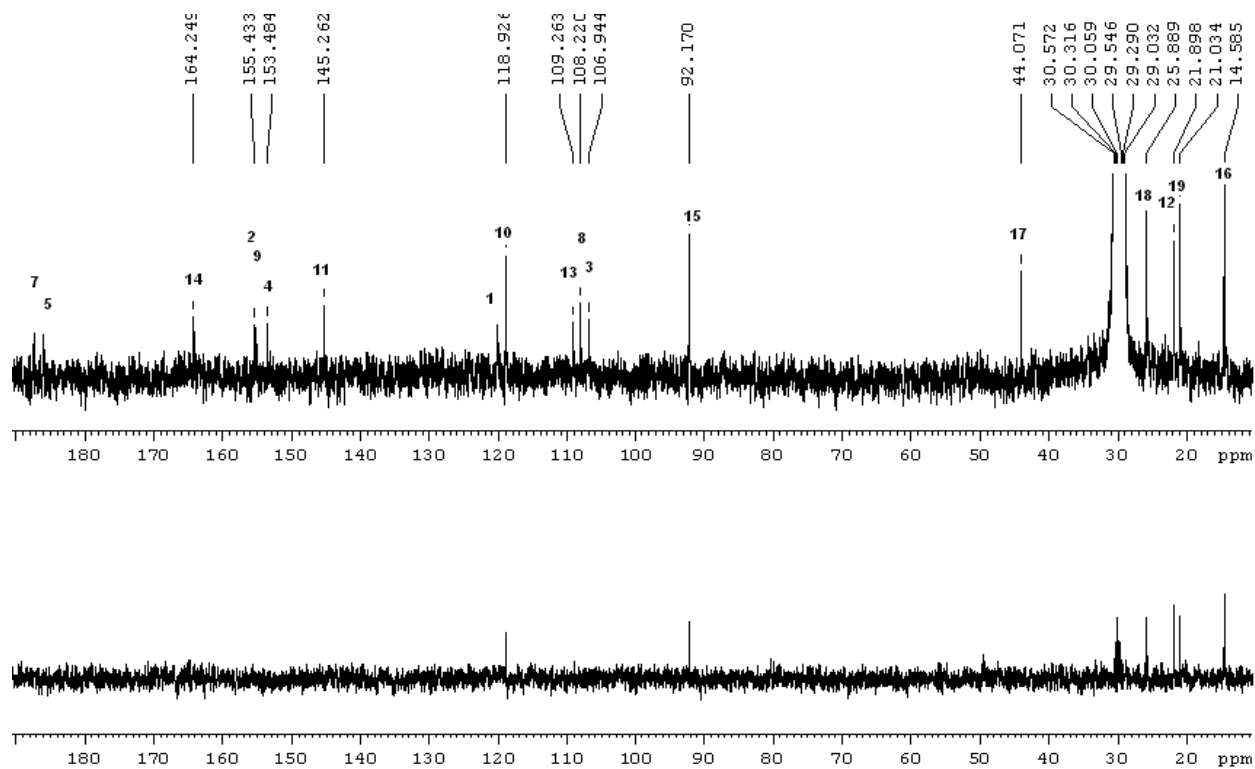

Supplement: c0ob00625d.pdf [file c0ob00625d.pdf]
